# Supplementary material for: “Mom Said after the Spring Festival, I’ve Grown a Year”: Chinese Preschoolers’ Perspectives on Growing Up
Source: MDPI journal article supplement (doi:10.3390/bs14030253), 2024-03-20
Supplement: s1 [file s1]

# SUPPLEMENTARY MATERIAL

**Table S1** Information about the participating children

| Number | Pseudonym  | Date of Birth | Gender | Paternal Education       | Maternal Education | Primary Caregiver                     | Siblings and Age Difference                             | Institution Attended |
|--------|------------|---------------|--------|--------------------------|--------------------|---------------------------------------|---------------------------------------------------------|----------------------|
| C1     | Dudu       | 2015.06       | Female | Bachelor's degree        | Bachelor's degree  | Mother                                | One sister, 3 years older                               | A Preschool          |
| C2     | Momo       | 2015.06       | Female | Master's degree          | Bachelor's degree  | Parents                               | One brother, 3 years older; one sister, 6 years younger | A Preschool          |
| C3     | Yuyu       | 2015.01       | Female | Bachelor's degree        | Bachelor's degree  | Parents, paternal grandmother         | One sister, 4 years younger                             | A Preschool          |
| C4     | Yaoyao     | 2014.10       | Female | Bachelor's degree        | Bachelor's degree  | Parents, grandmothers                 | None                                                    | A Preschool          |
| C5     | Manman     | 2015.05       | Female | Bachelor's degree        | Bachelor's degree  | Parents, grandparents                 | One brother, 3 years older                              | A Preschool          |
| C6     | Ziyue      | 2015.04       | Female | Bachelor's degree        | Bachelor's degree  | Parents, maternal grandparents        | None                                                    | A Preschool          |
| C7     | Gege       | 2014.10       | Female | Bachelor's degree        | Bachelor's degree  | Parents, paternal grandparents        | None                                                    | A Preschool          |
| C8     | Xiaoxue    | 2015.01       | Female | Bachelor's degree        | Bachelor's degree  | Parents, paternal grandmother         | One brother, 6 years younger                            | A Preschool          |
| C9     | Lulu       | 2015.01       | Female | Bachelor's degree        | N/A                | Parents                               | One older brother, age undisclosed                      | A Preschool          |
| C10    | Qiqi       | 2015.03       | Female | Bachelor's degree        | Bachelor's degree  | Parents                               | None                                                    | A Preschool          |
| C11    | Xiaozao    | 2015.04       | Female | N/A                      | Associate degree   | Mother, maternal grandmother, a nanny | None                                                    | A Preschool          |
| C12    | Zhuzhu     | 2014.09       | Female | Bachelor's degree        | Bachelor's degree  | Parents                               | None                                                    | A Preschool          |
| C13    | Xiaoquan   | 2014.12       | Male   | Bachelor's degree        | Bachelor's degree  | Mother, aunt                          | One sister, 6 years older                               | A Preschool          |
| C14    | Ningning   | 2015.04       | Male   | Master's degree          | Bachelor's degree  | Parents, paternal grandparents        | None                                                    | A Preschool          |
| C15    | Chenchen   | 2014.11       | Male   | Bachelor's degree        | Bachelor's degree  | Parents, great-aunt                   | One sister, 2 years younger                             | A Preschool          |
| C16    | Chengcheng | 2015.01       | Male   | Associate degree         | Bachelor's degree  | Parents, paternal grandmother         | None                                                    | A Preschool          |
| C17    | Qiaoqiao   | 2014.09       | Male   | Bachelor's degree        | Bachelor's degree  | Parents                               | One sister, 4 years older                               | A Preschool          |
| C18    | Xuxu       | 2015.07       | Male   | Bachelor's degree        | Bachelor's degree  | Parents, paternal grandparents        | None                                                    | A Preschool          |
| C19    | Xiaocheng  | 2015.05       | Male   | Master's degree          | Bachelor's degree  | Parents, paternal grandparents        | One brother, 3 years older                              | A Preschool          |
| C20    | Hanghang   | 2015.06       | Male   | Doctoral degree          | Bachelor's degree  | Parents, paternal grandparents        | One sister, 5 years younger                             | A Preschool          |
| C21    | Maomao     | 2015.05       | Male   | Bachelor's degree        | N/A                | Parents, paternal grandparents        | One older brother, age undisclosed                      | A Preschool          |
| C22    | Yiyi       | 2014.09       | Male   | Bachelor's degree        | Bachelor's degree  | Parents, paternal grandparents        | None                                                    | A Preschool          |
| C23    | Xinxin     | 2015.07       | Female | Technical school diploma | Associate degree   | Parents                               | One sister, five years older                            | B Preschool          |
| C24    | Tangbao    | 2015.06       | Female | N/A                      | N/A                | Parents                               | One older sister, age undisclosed                       | B Preschool          |
| C25    | Xiaoyu     | 2015.05       | Female | Bachelor's degree        | Master's degree    | Parents, paternal grandmother         | None                                                    | B Preschool          |
| C26    | Feifei     | 2014.10       | Female | Bachelor's degree        | Master's degree    | Mother, paternal grandparents         | None                                                    | B Preschool          |
| C27    | Miaomiao   | 2015.06       | Female | Associate degree         | Bachelor's degree  | Parents, maternal grandparents        | None                                                    | B Preschool          |
| C28    | Yueyue     | 2015.07       | Female | Associate degree         | Bachelor's degree  | Parents                               | One sister, 2 years younger                             | B Preschool          |

|     |            |         |        |                            |                            |                                |                                   |             |
|-----|------------|---------|--------|----------------------------|----------------------------|--------------------------------|-----------------------------------|-------------|
| C29 | Sining     | 2014.10 | Female | Technical school diploma   | Technical school diploma   | Parents                        | None                              | B Preschool |
| C30 | Ningyi     | 2015.01 | Female | Master's degree            | Bachelor's degree          | Parents, maternal grandmother  | None                              | B Preschool |
| C31 | Jingyi     | 2015.03 | Female | N/A                        | N/A                        | Parents, maternal grandmother  | One older sister, age undisclosed | B Preschool |
| C32 | Yanyan     | 2015.07 | Female | Associate degree           | Associate degree           | Parents, paternal grandparents | None                              | B Preschool |
| C33 | Xiaorui    | 2015.08 | Male   | High school diploma        | N/A                        | Parents, maternal grandparents | None                              | B Preschool |
| C34 | Jiajia     | 2014.10 | Male   | Technical school diploma   | Associate degree           | Parents, grandmothers          | One brother, 2 years older        | B Preschool |
| C35 | Zhengzheng | 2014.12 | Male   | Master's degree            | Master's degree            | Parents, maternal grandmother  | None                              | B Preschool |
| C36 | Anan       | 2015.08 | Male   | Associate degree           | Associate degree           | Parents                        | One sister, 2 years younger       | B Preschool |
| C37 | Xuanxuan   | 2014.10 | Male   | Junior high school diploma | Technical school diploma   | Parents, maternal grandparents | One sister, 2 years older         | B Preschool |
| C38 | Qiuqiu     | 2015.04 | Male   | Technical school diploma   | Bachelor's degree          | Parents                        | None                              | B Preschool |
| C39 | Haohao     | 2014.11 | Male   | High school diploma        | High school diploma        | Parents                        | One sister, 8 years older         | B Preschool |
| C40 | Ranran     | 2015.02 | Male   | Bachelor's degree          | Bachelor's degree          | Parents, maternal grandparents | None                              | B Preschool |
| C41 | Xiaobo     | 2014.09 | Male   | High school diploma        | Junior high school diploma | Parents                        | One sister, 6 years older         | B Preschool |
| C42 | Xiaoai     | 2015.04 | Male   | High school diploma        | Junior high school diploma | Parents, paternal grandfather  | One older sister, age undisclosed | B Preschool |
| C43 | Ruirui     | 2016.08 | Female | Bachelor's degree          | Bachelor's degree          | Parents, maternal grandparents | One sister, 3 years older         | C Preschool |
| C44 | Xiaoyou    | 2016.06 | Female | Bachelor's degree          | Bachelor's degree          | Parents, paternal grandmother  | One brother, 5 years older        | C Preschool |
| C45 | Xiaomiao   | 2015.10 | Female | Doctoral degree            | Doctoral degree            | Parents, maternal grandparents | None                              | C Preschool |
| C46 | Xiaoman    | 2016.05 | Female | Bachelor's degree          | Master's degree            | Parents, paternal grandmother  | None                              | C Preschool |
| C47 | Shishi     | 2016.04 | Female | Bachelor's degree          | Master's degree            | Parents, maternal grandparents | None                              | C Preschool |
| C48 | Xixi       | 2016.04 | Female | Bachelor's degree          | Bachelor's degree          | Parents, maternal grandmother  | None                              | C Preschool |
| C49 | Xiaomo     | 2016.04 | Female | Bachelor's degree          | Master's degree            | Parents, maternal grandparents | One brother, 2 years younger      | C Preschool |
| C50 | Xiaoyuan   | 2016.07 | Male   | Master's degree            | Bachelor's degree          | Parents, paternal grandmother  | None                              | C Preschool |
| C51 | Jiujiu     | 2015.12 | Male   | Master's degree            | Master's degree            | Parents, maternal grandparents | None                              | C Preschool |
| C52 | Dingding   | 2015.10 | Male   | Bachelor's degree          | Bachelor's degree          | Mother, maternal grandparents  | One sister, 6 years older         | C Preschool |
| C53 | Zhaozhao   | 2016.05 | Male   | Bachelor's degree          | Bachelor's degree          | Parents, paternal grandparents | One brother, 6 years older        | C Preschool |
| C54 | Zimo       | 2016.07 | Male   | Master's degree            | Master's degree            | Parents, paternal grandmother  | None                              | C Preschool |
| C55 | Hetao      | 2015.10 | Male   | Bachelor's degree          | Bachelor's degree          | Mother, maternal grandmother   | None                              | C Preschool |
| C56 | Mumu       | 2016.06 | Male   | Bachelor's degree          | Bachelor's degree          | Parents, maternal grandmother  | One sister, 3 years younger       | C Preschool |

Note: The information in the table was provided by the parents and class teachers of the preschoolers. 'N/A' refers to the information that parents did not provide due to privacy concerns.
